# Supplementary material
Source: PubMed Central journal article supplement (PMC8117765)
Supplement: AEM.02884-20-s0001.pdf [file AEM.02884-20-s0001.pdf]

**Supplemental Material for: Applied and Environmental Microbiology**

**Soybean Root Nodule and Rhizosphere Microbiome: Distribution of Rhizobial and Non-rhizobial Endophytes**

**Parris Mayhood<sup>1</sup>, Babur S Mirza<sup>1\*</sup>**

<sup>1</sup> Department of Biology, Missouri State University, Springfield, Missouri, 65897, USA

\*Corresponding author: Babur S Mirza  
Missouri State University  
Department of Biology  
901 S. National Ave. Springfield, MO 65897  
Phone: 417-836-5062  
Fax: 417-836-4204  
E-mail: baburmirza@missouristate.edu

28

29 **Supplementary Figures:** Figures 1-9

30 **Supplementary Tables:** Table 1-4

31 **Fig. S1.** Roots from one of the soybean plants (L1P1N1-23). The 23 intact root nodules  
32 that were selected for the microbiome analysis are indicated (arrows).

33 **Fig. S2:** A comparison of bacterial genera identified by 16S rRNA gene  
34 sequences from the root nodules and rhizosphere soil of plant 1 (L1P1N1-23).  
35 The total number of DNA sequences obtained from root nodules (826,945) and  
36 rhizosphere soil (19,345) of plant 1 were used for this comparison.

37 **Fig. S3:** Species accumulation curve for the root nodules and a rhizosphere  
38 sample of plant 1 (L1P1N1-23).

39 **Fig. S4 A&B:** Nonmetric multidimensional scaling representation of 16S rRNA  
40 gene sequences from root nodules of plant 1 (L1P1N1-23). A). Describing the  
41 influence of root nodule location on a root system and B) size of the root nodules  
42 on bacterial endophytes. The two-dimensional stress was 0.11 and 0.10 for  
43 panels A and B, respectively.

44 **Fig. S5:** Maximum likelihood phylogenetic tree based on partial sequences of the  
45 16S rRNA gene of the *Nitrobacter* related sequences detected within root  
46 nodules and rhizosphere soil of soybean plants. The distribution of  
47 related *Nitrobacter* sequences from GenBank is shown next to the cluster. The  
48 numbers at the nodes reflect bootstrap support values that were above 50%.

49 **Fig. S6:** Maximum likelihood phylogenetic tree based on partial sequences of  
50 the 16S rRNA gene of the *Tardiphaga* related sequences detected within root  
51 nodules and rhizosphere soil of soybean plants. The numbers at the nodes  
52 reflect bootstrap support values that were above 50%.

53 **Fig. S7:** Soil and plant samples were collected from three locations within the  
54 Kindrick farm.

55 **Fig. S8:** Soybean root nodules intact with the root system. **A).** before cleaning  
56 and **B).** after cleaning the nodule surfaces.

57 **Fig. S9:** Description of two step PCR approach for 16S rRNA gene amplification  
58 and library preparation for Illumina MiSeq paired-end DNA sequencing.

59

#### 60 **Supplemental Tables:**

61 **Table S1:** Culture and culture-independent based studies focused on the non-  
62 rhizobial endophytes within soybean root nodules.

63 **Table S2:** Distribution of various non-rhizobial endophytes within root nodules of a  
64 plant (L1P1N1-23).

65 **Table S3:** Bacterial diversity within root nodules of a plant and rhizosphere soil. In  
66 sample ID, L1-3 represents three locations (1-3), P1-9 represents nine plant (1-9),  
67 N represents the nodules per plant (N1-23), and R is for rhizosphere samples.

68 **Table S4:** Soil physiochemical characteristics of soil attached with soybean plants  
69 from three locations within Kindrick farm.

70 **Table S5:** List of unique indices used for each of the root nodules and soil  
71 samples.

Fig. S1

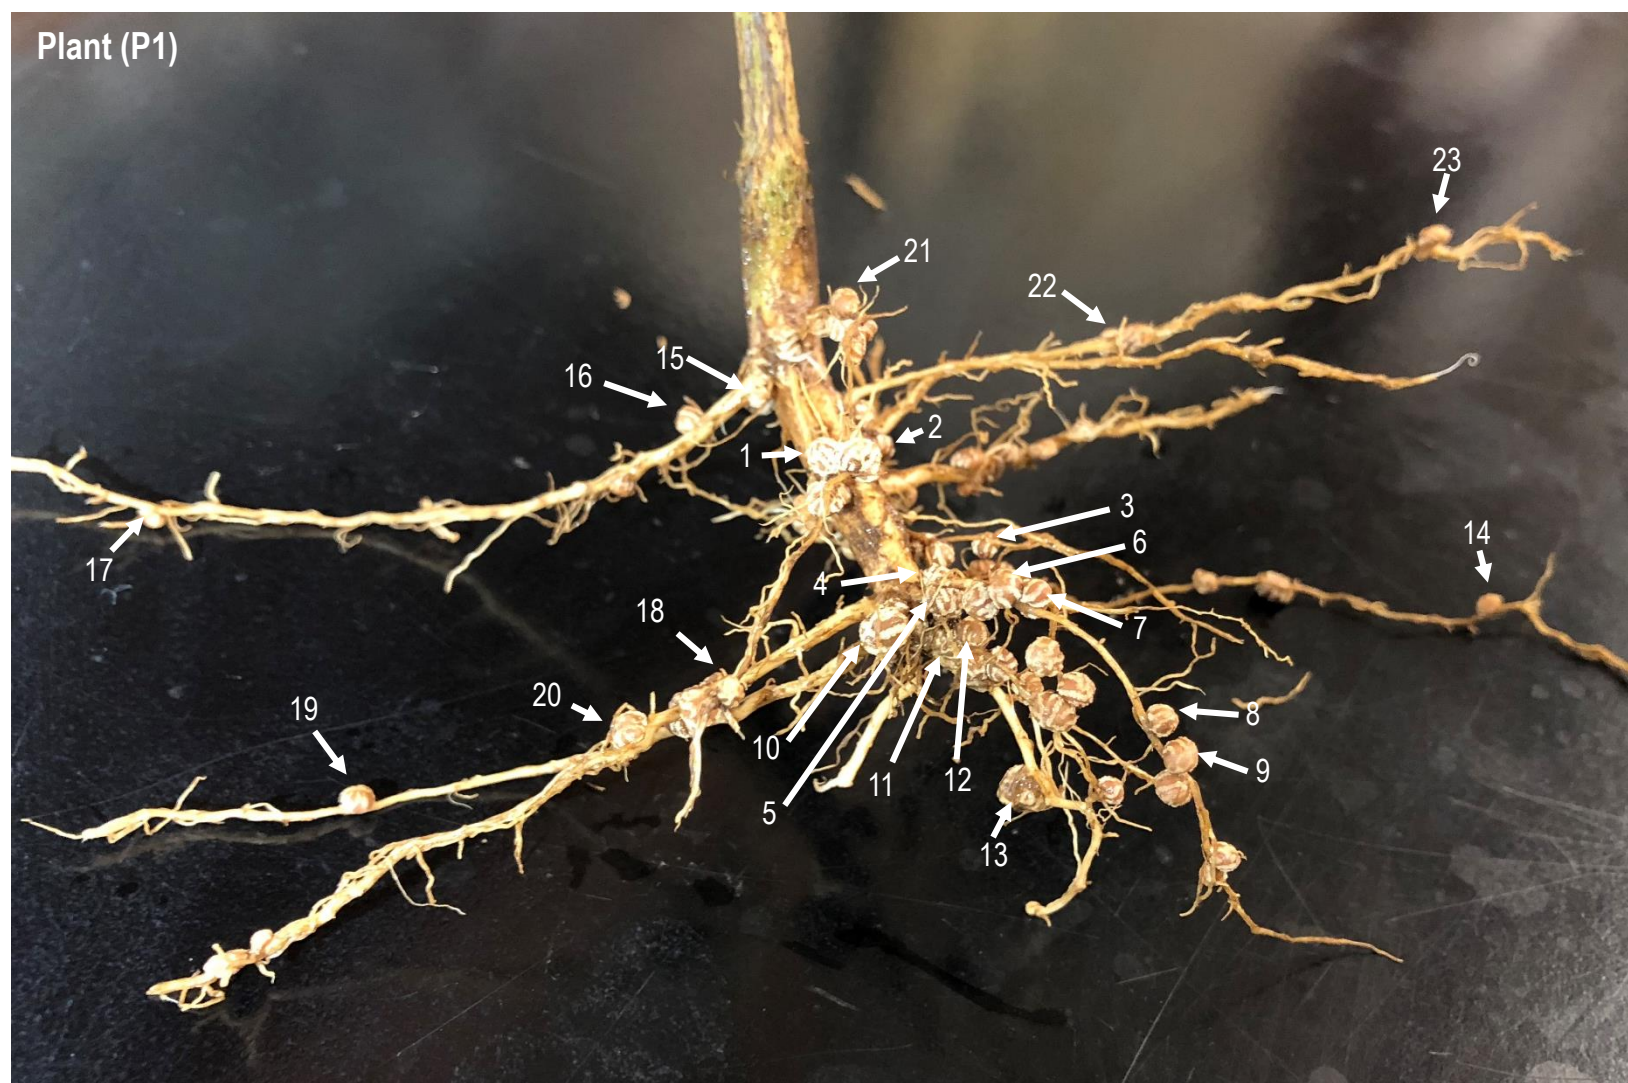

Fig. S2

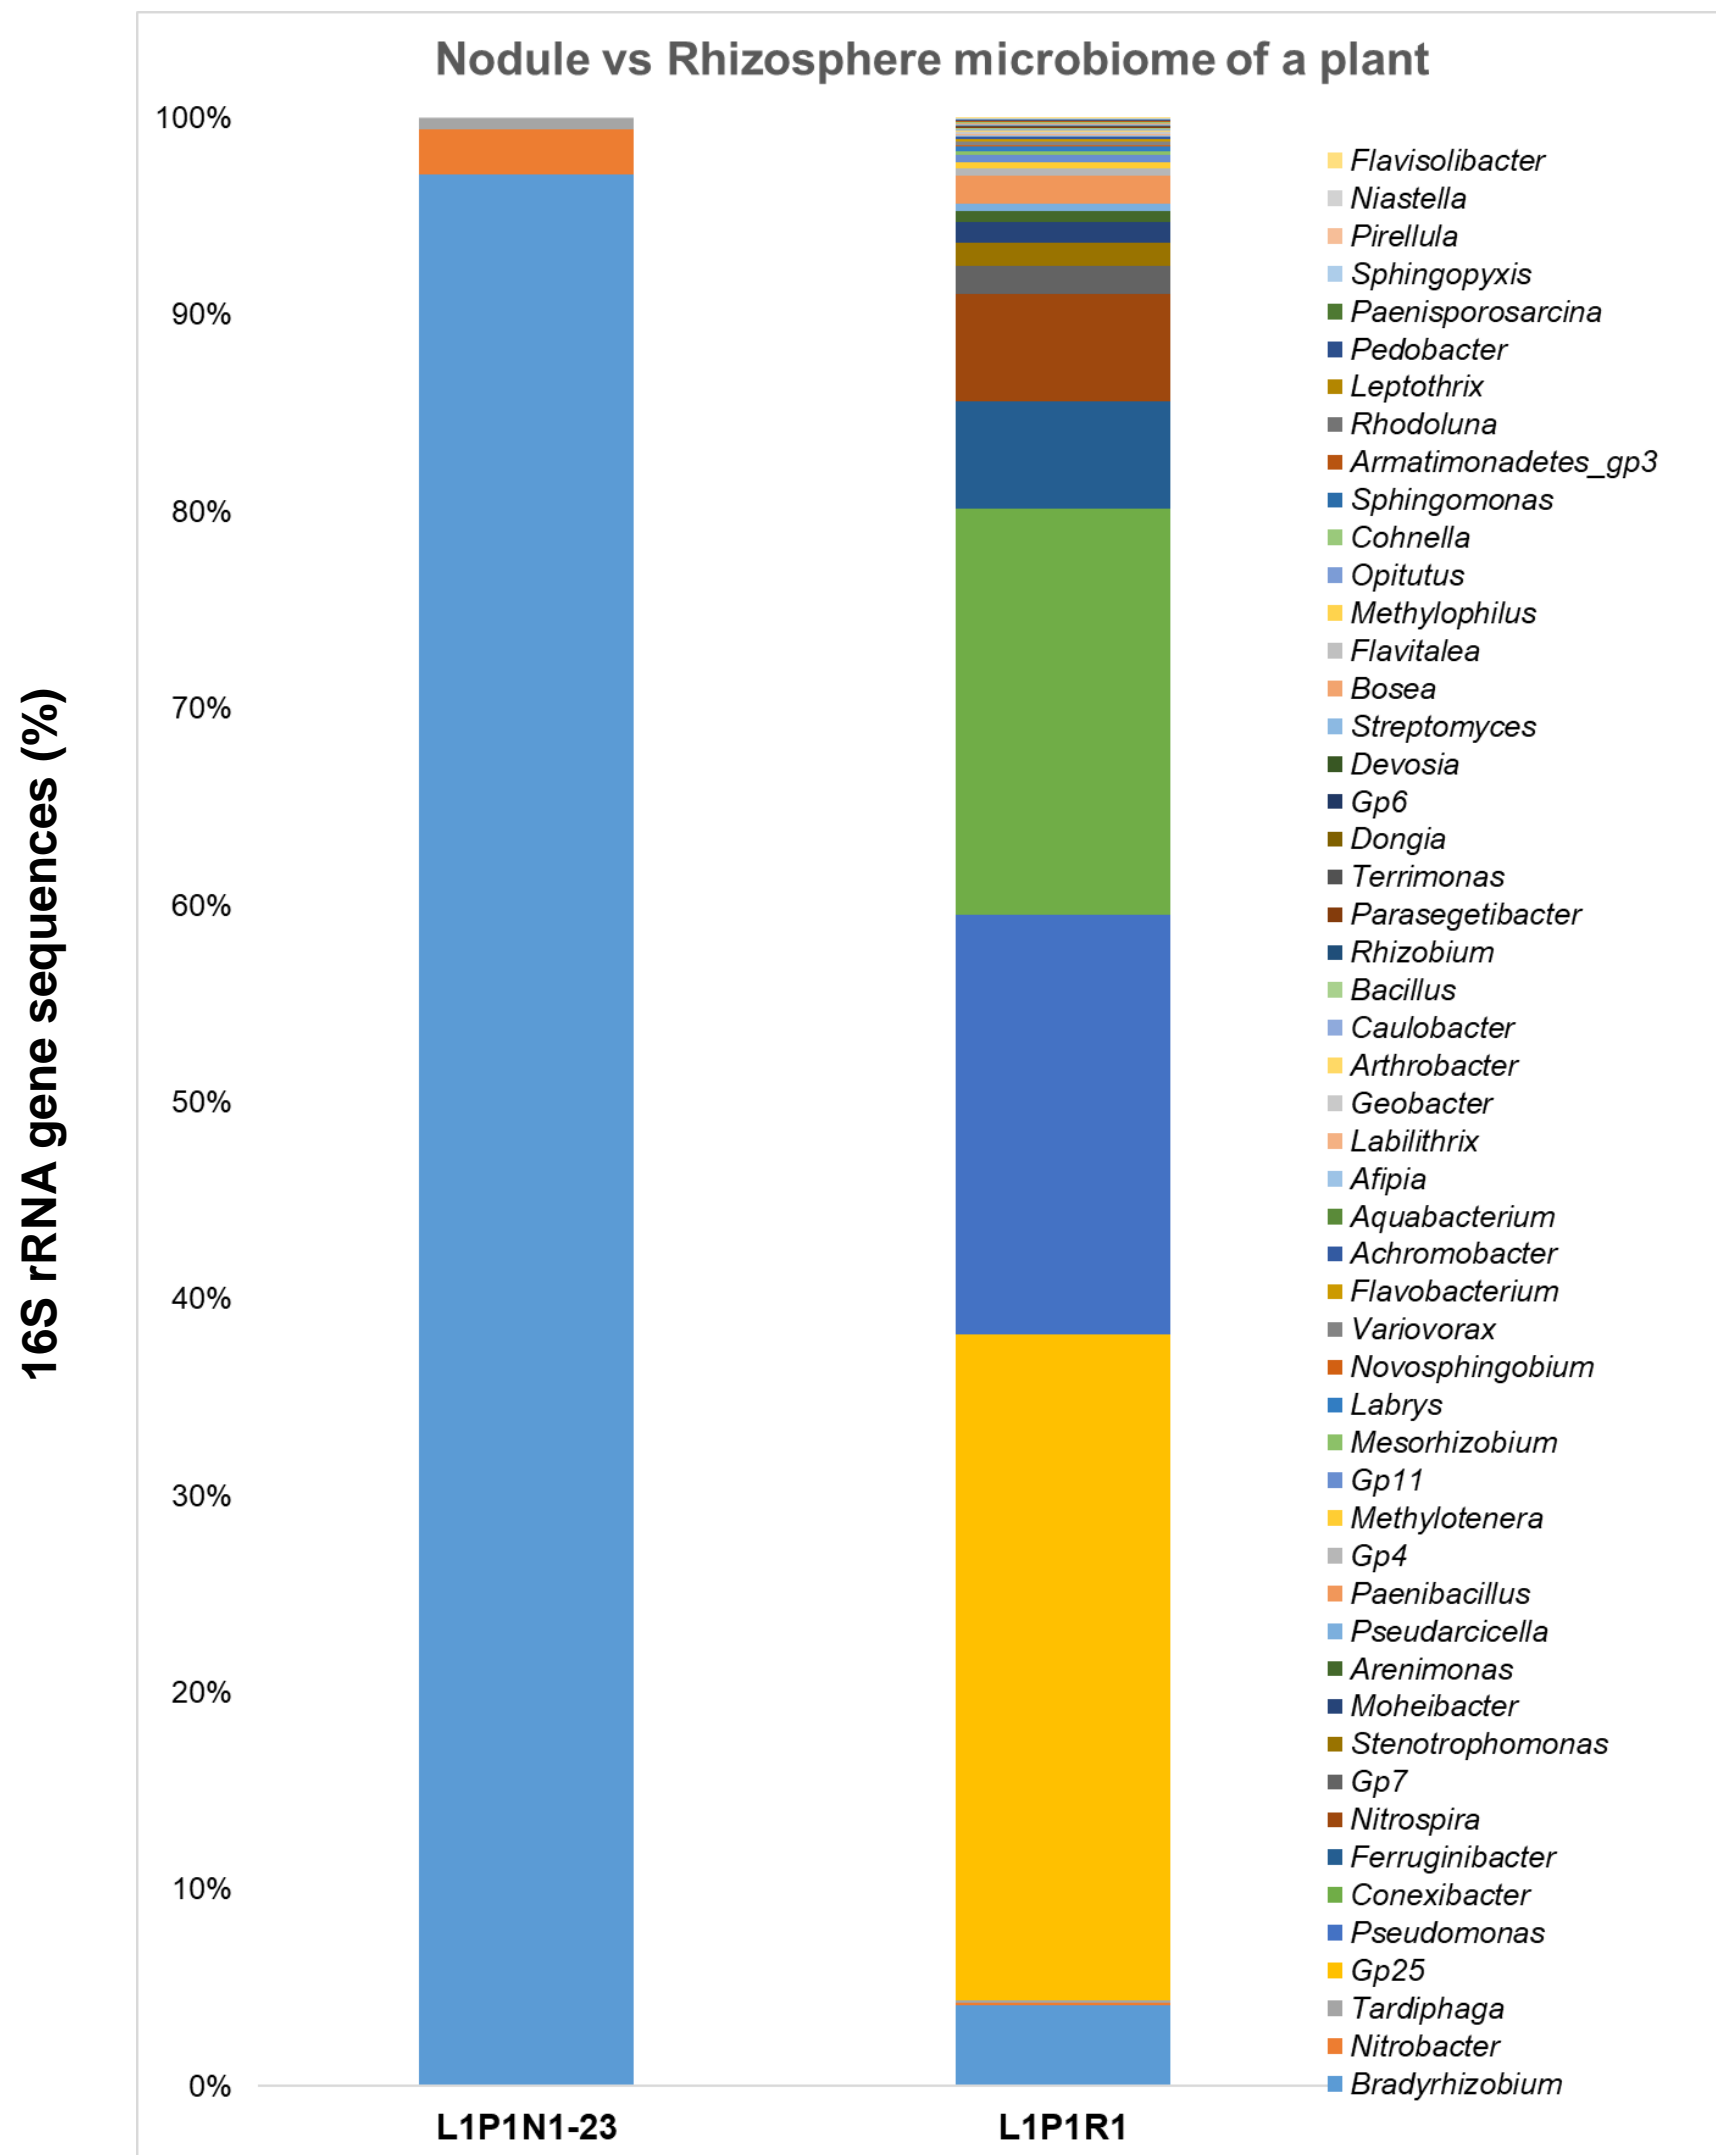

Fig. S3

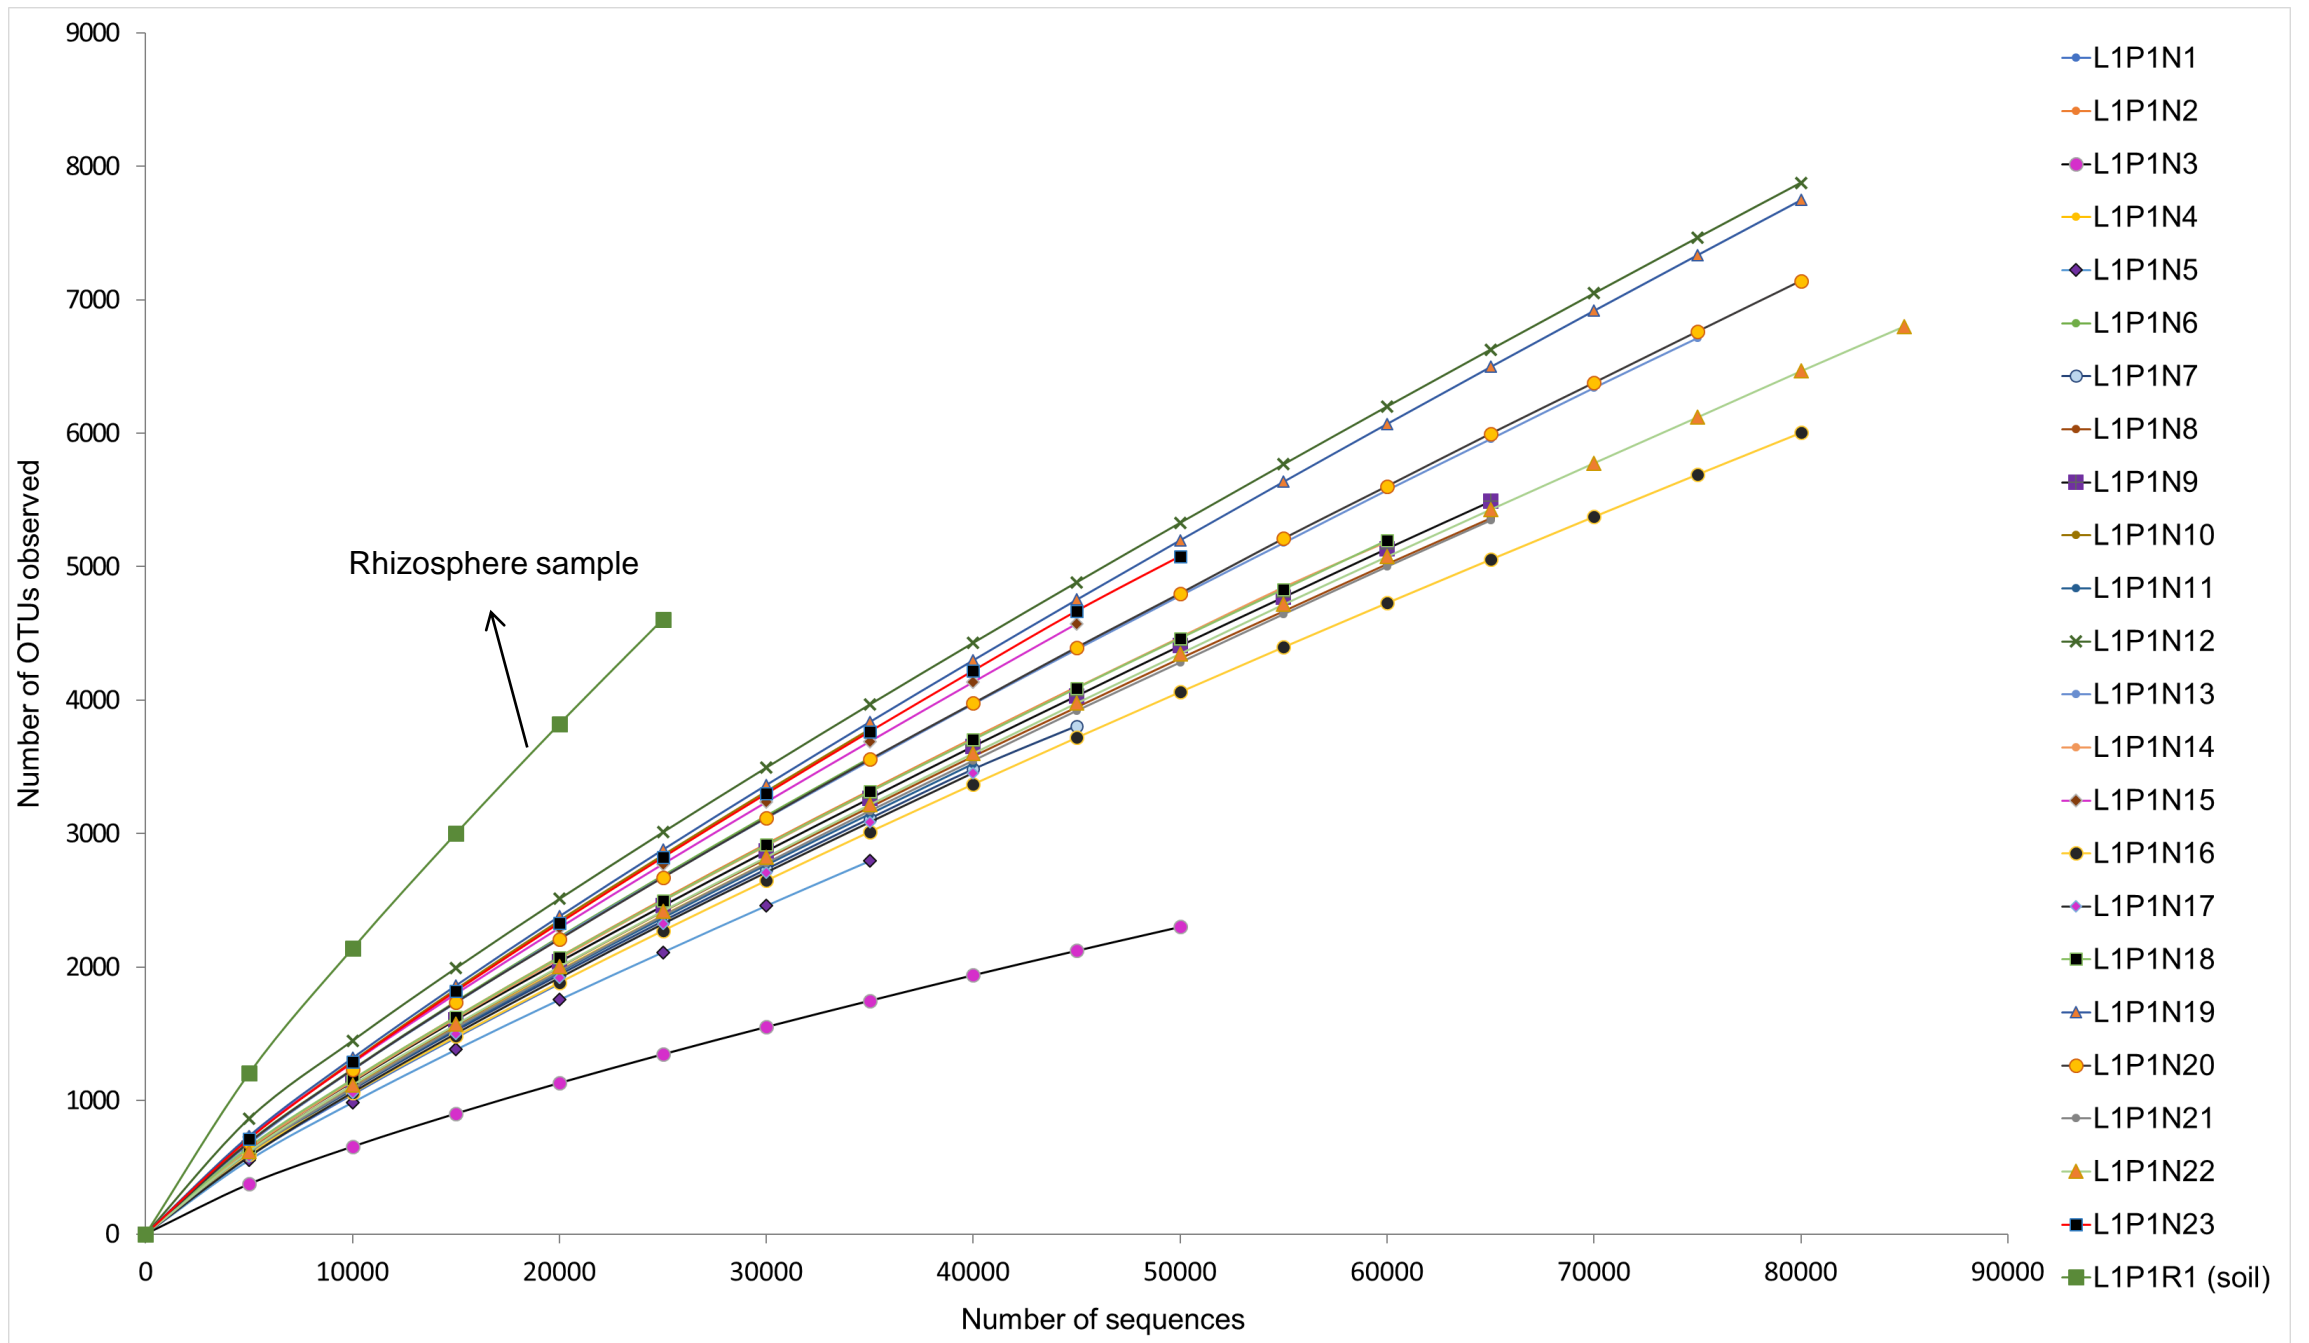

Fig. S4 A&B

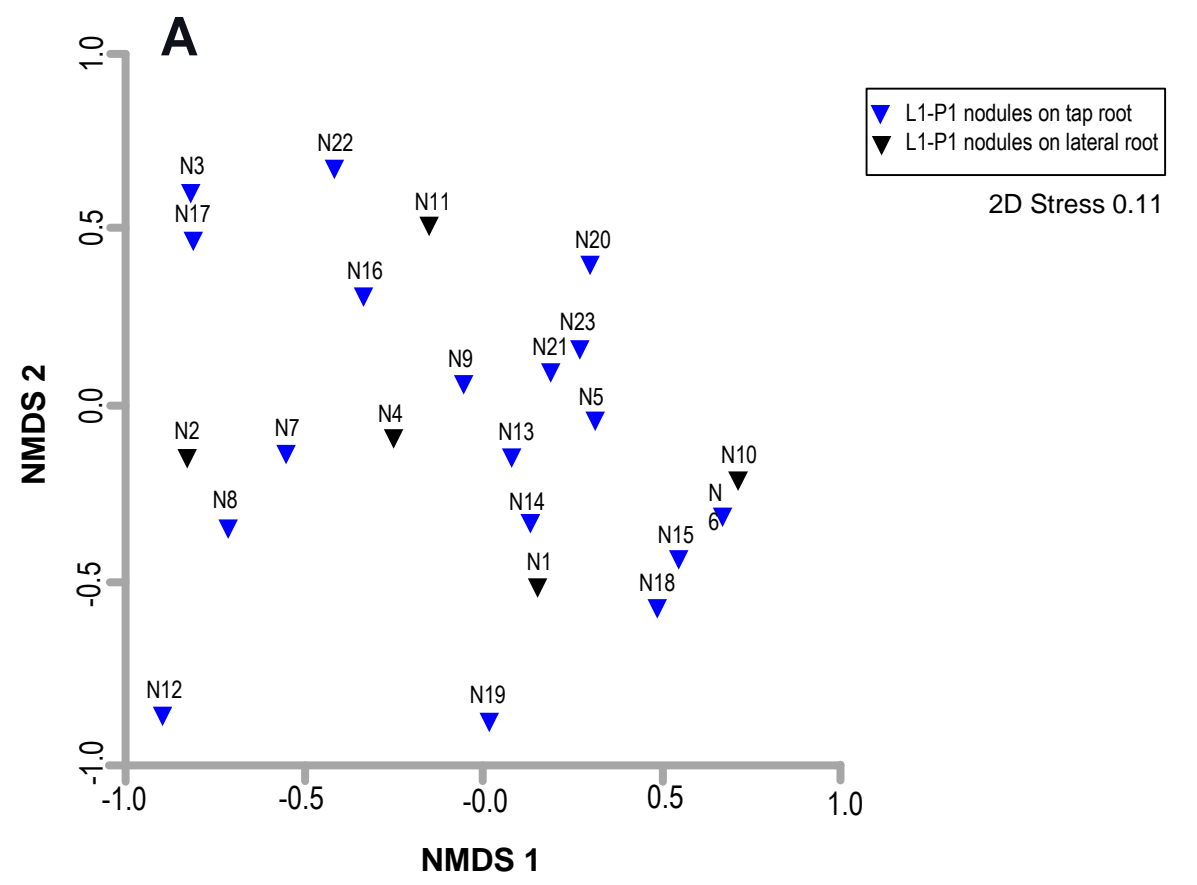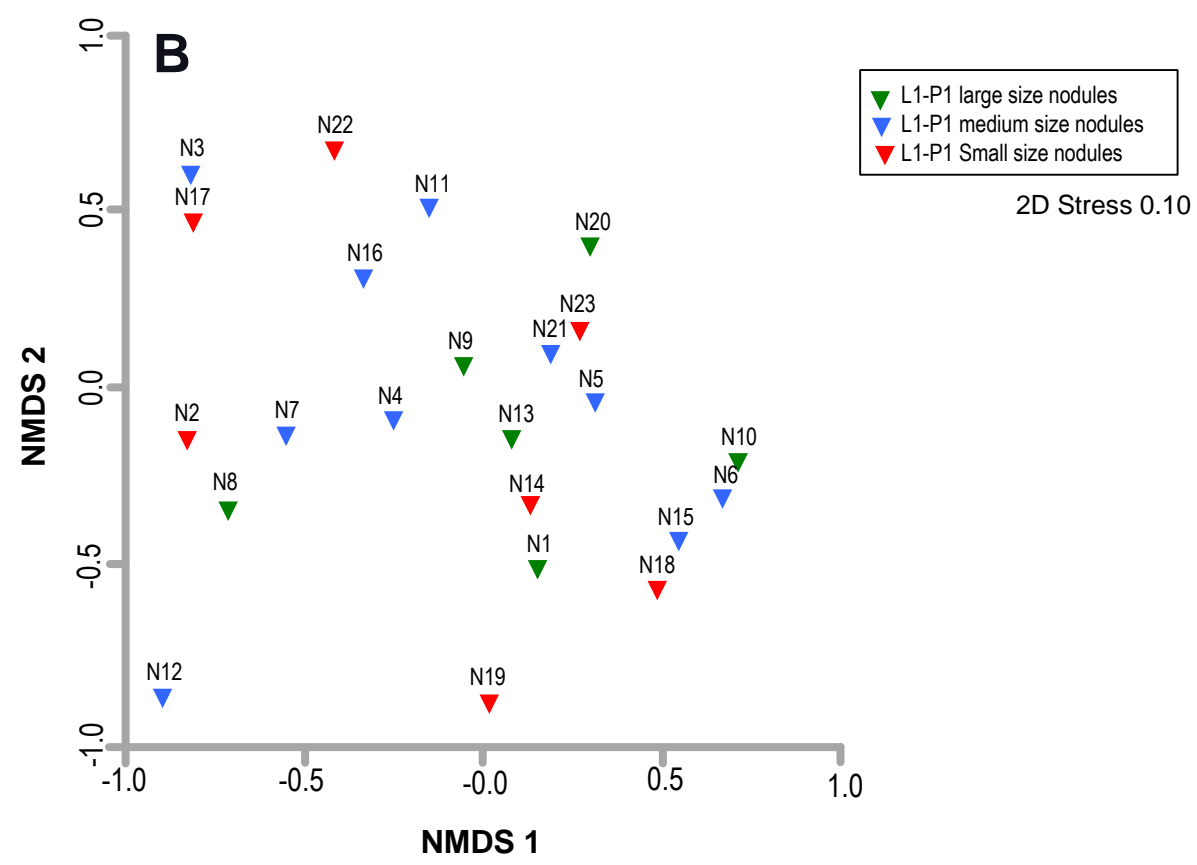

Fig. S5

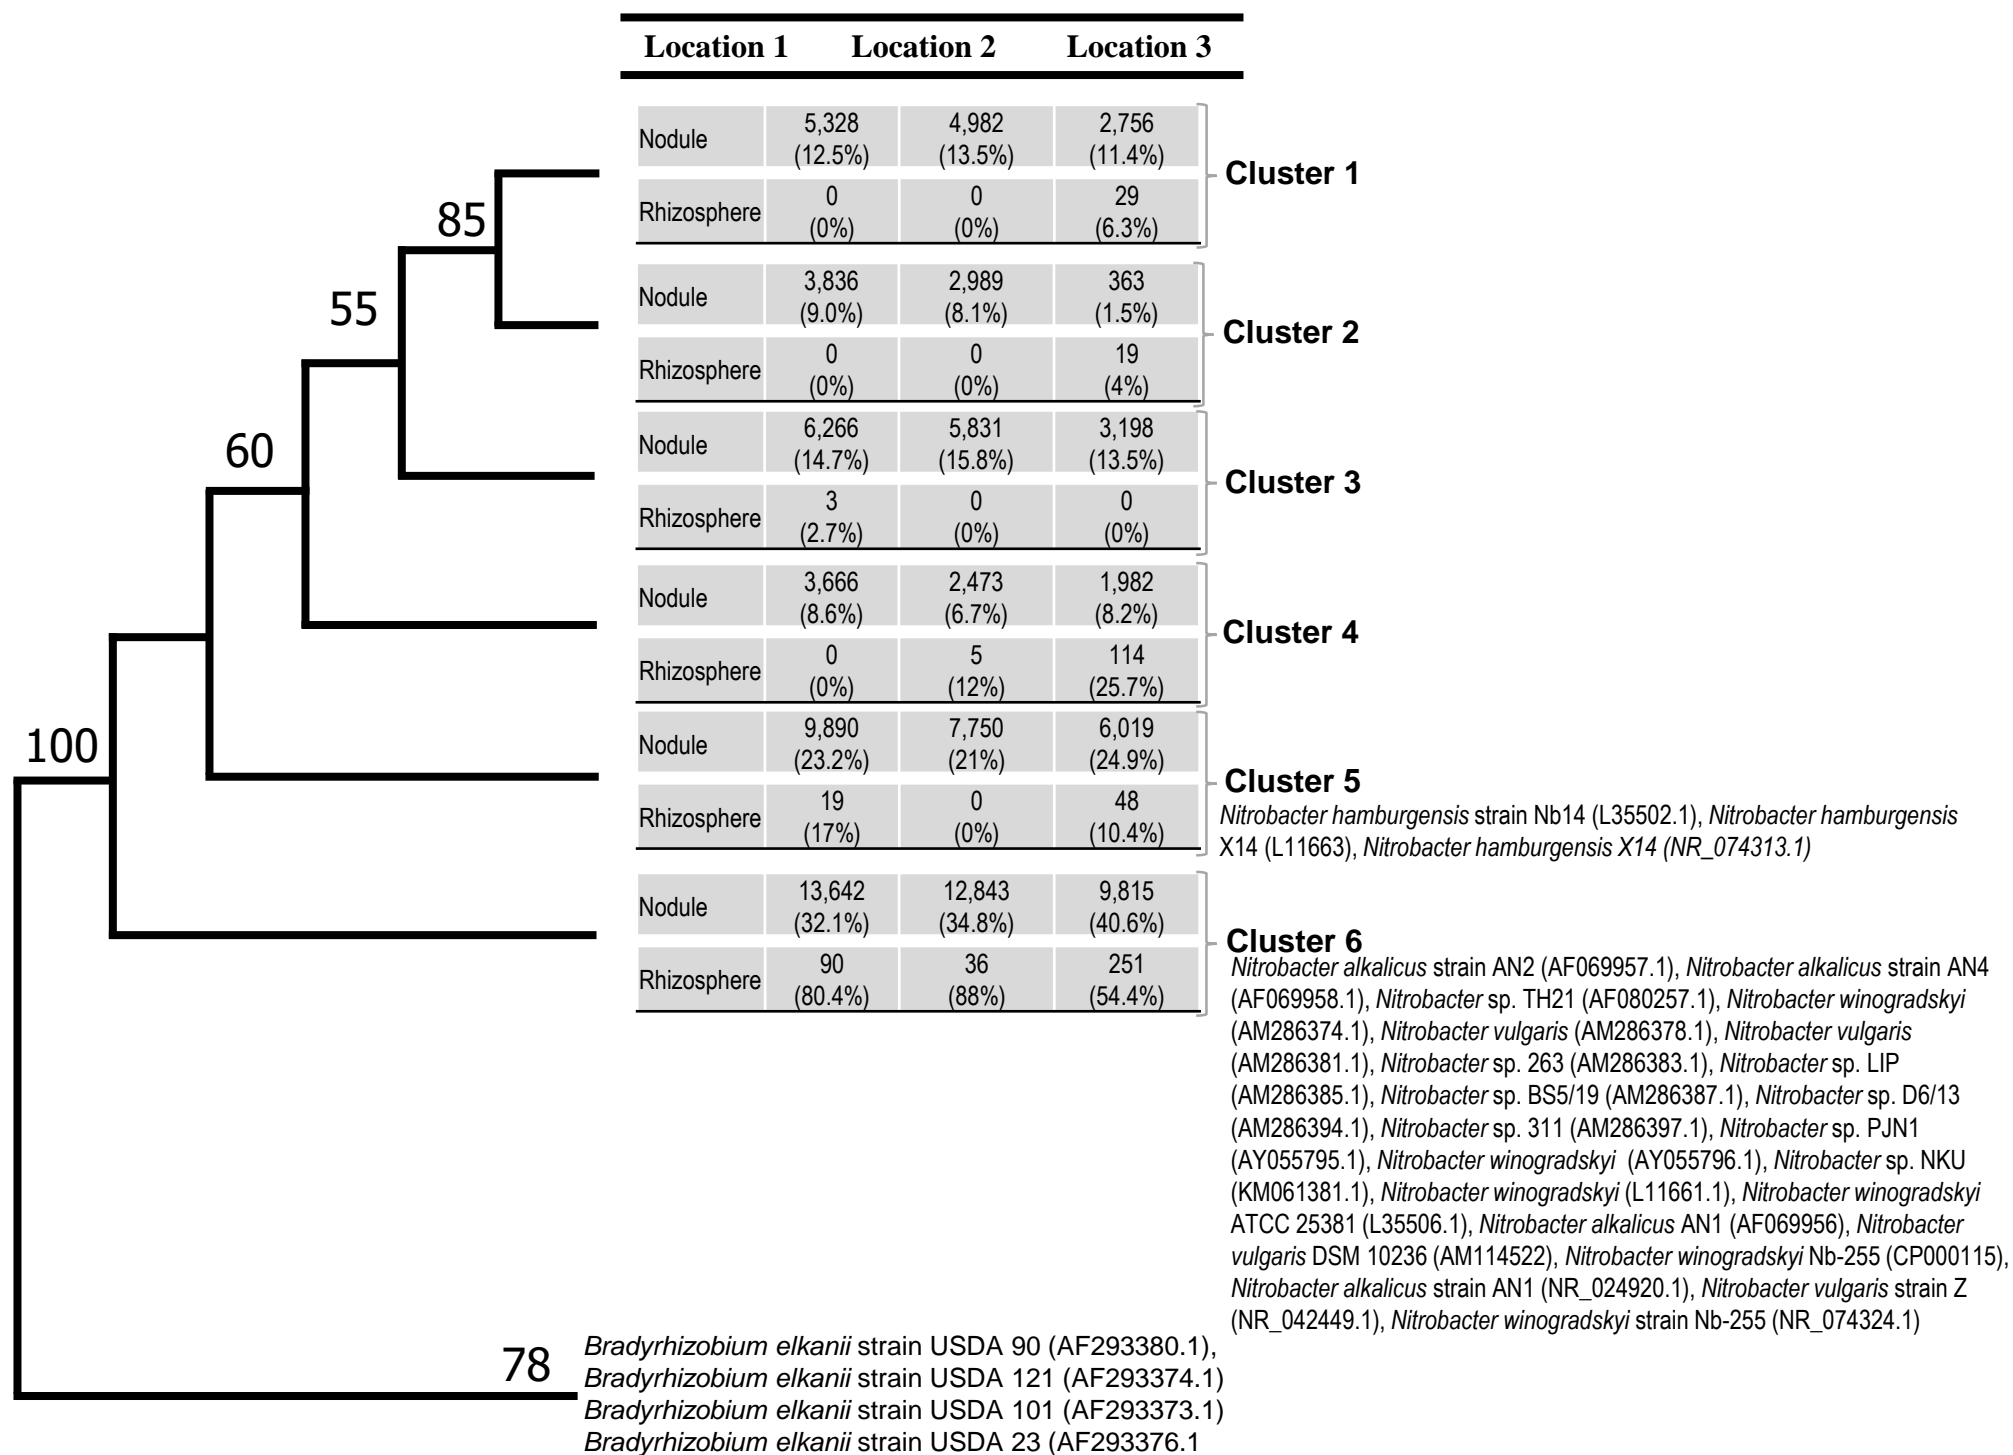



Fig. S6

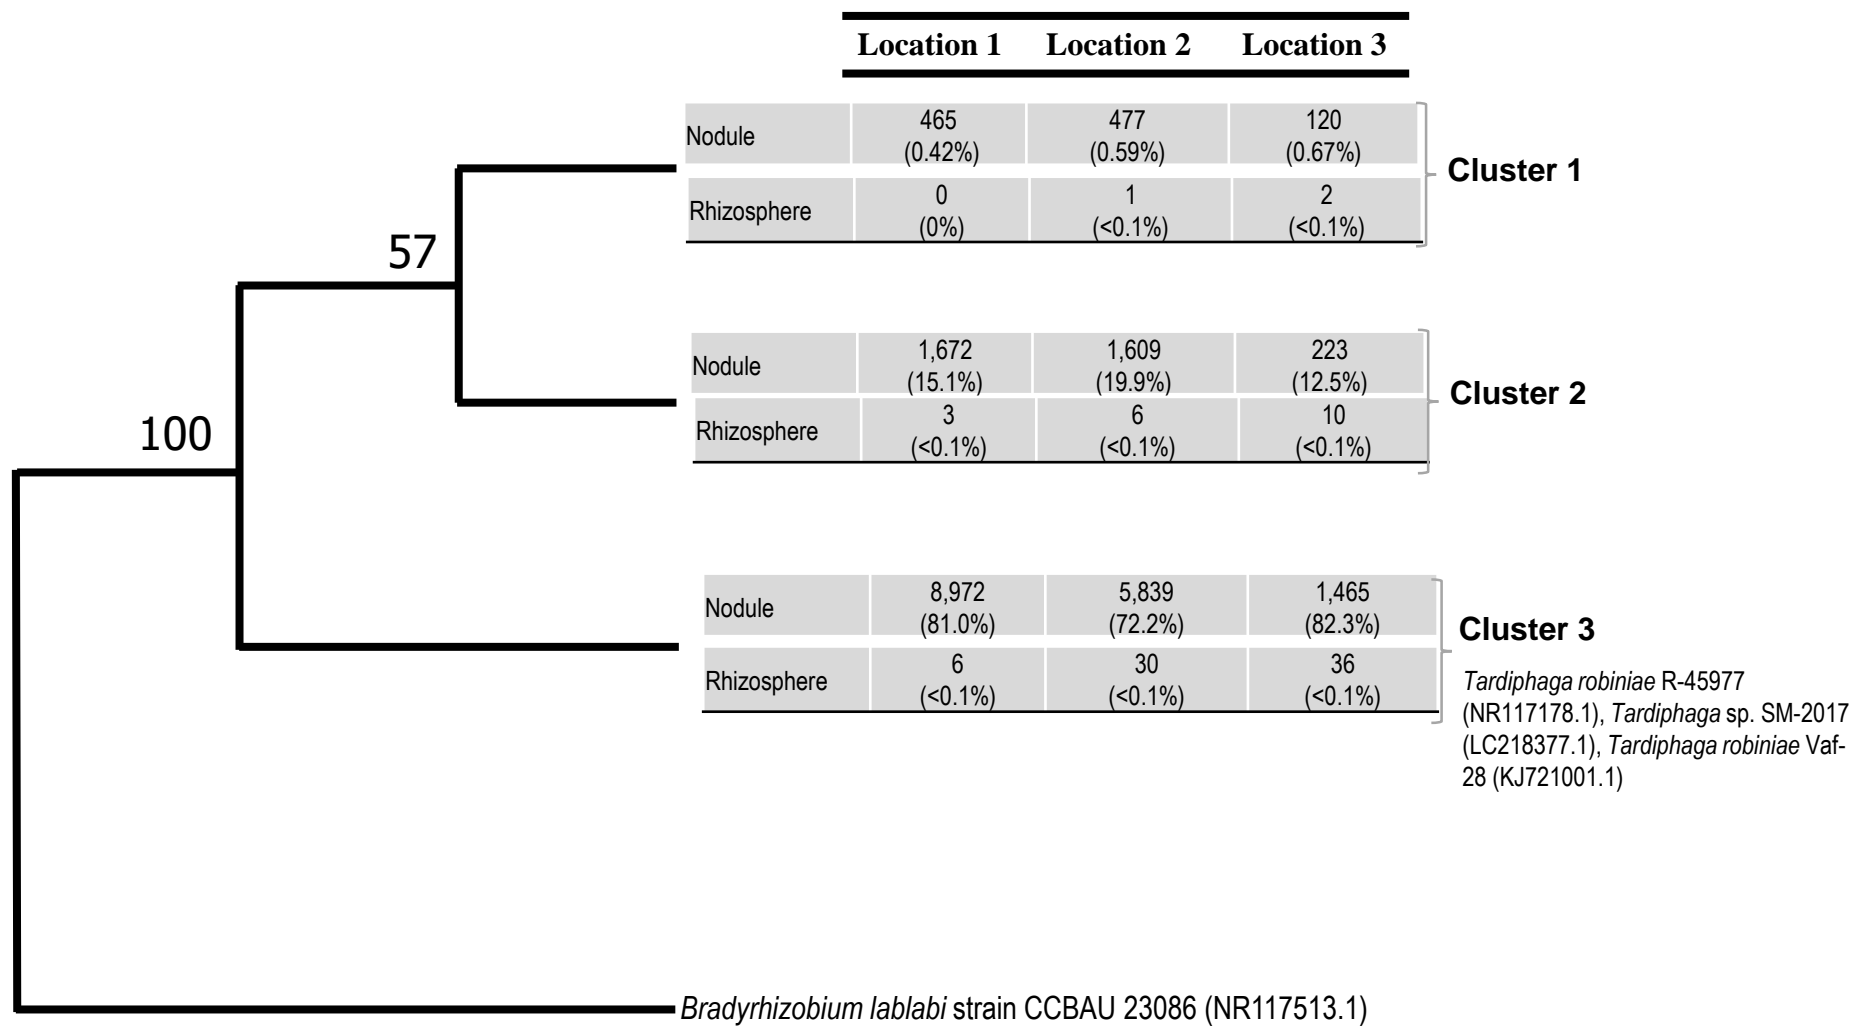

Fig. S7

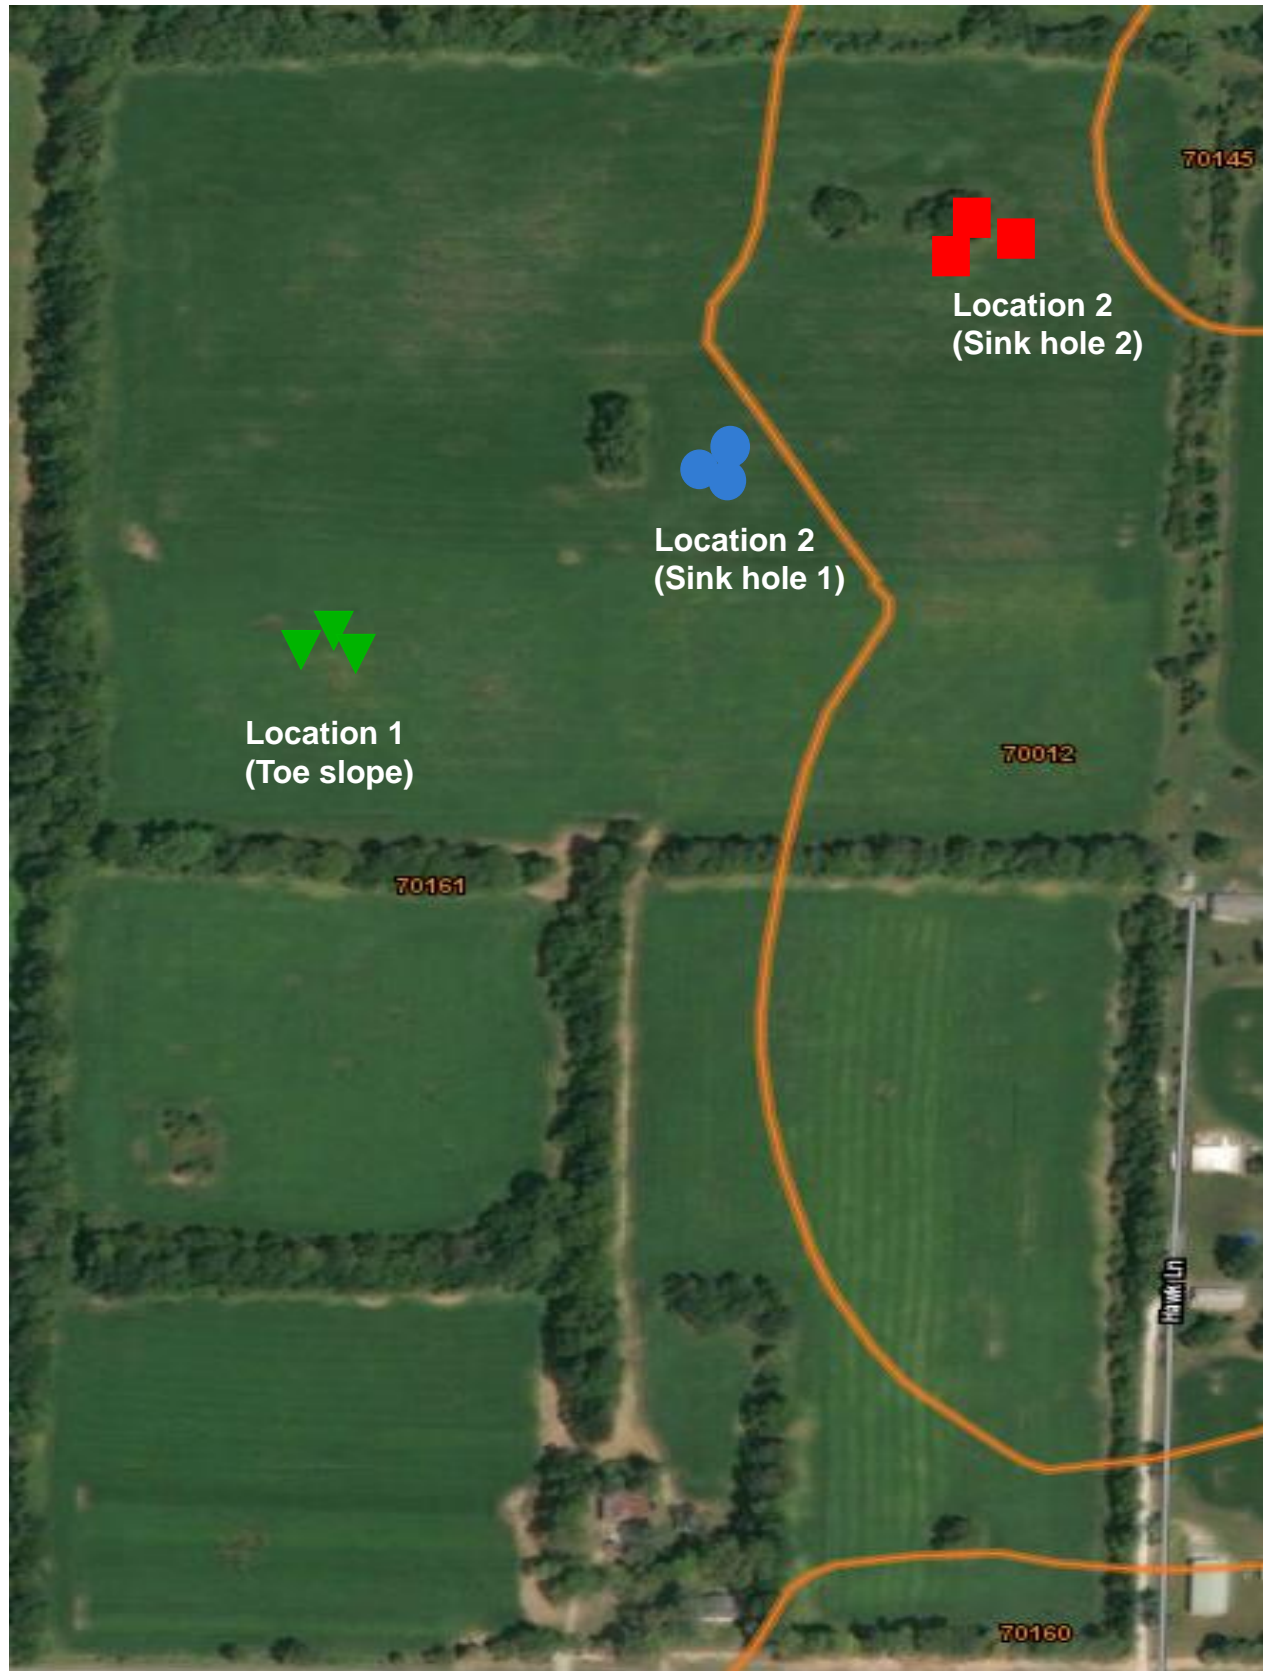

Fig. S8

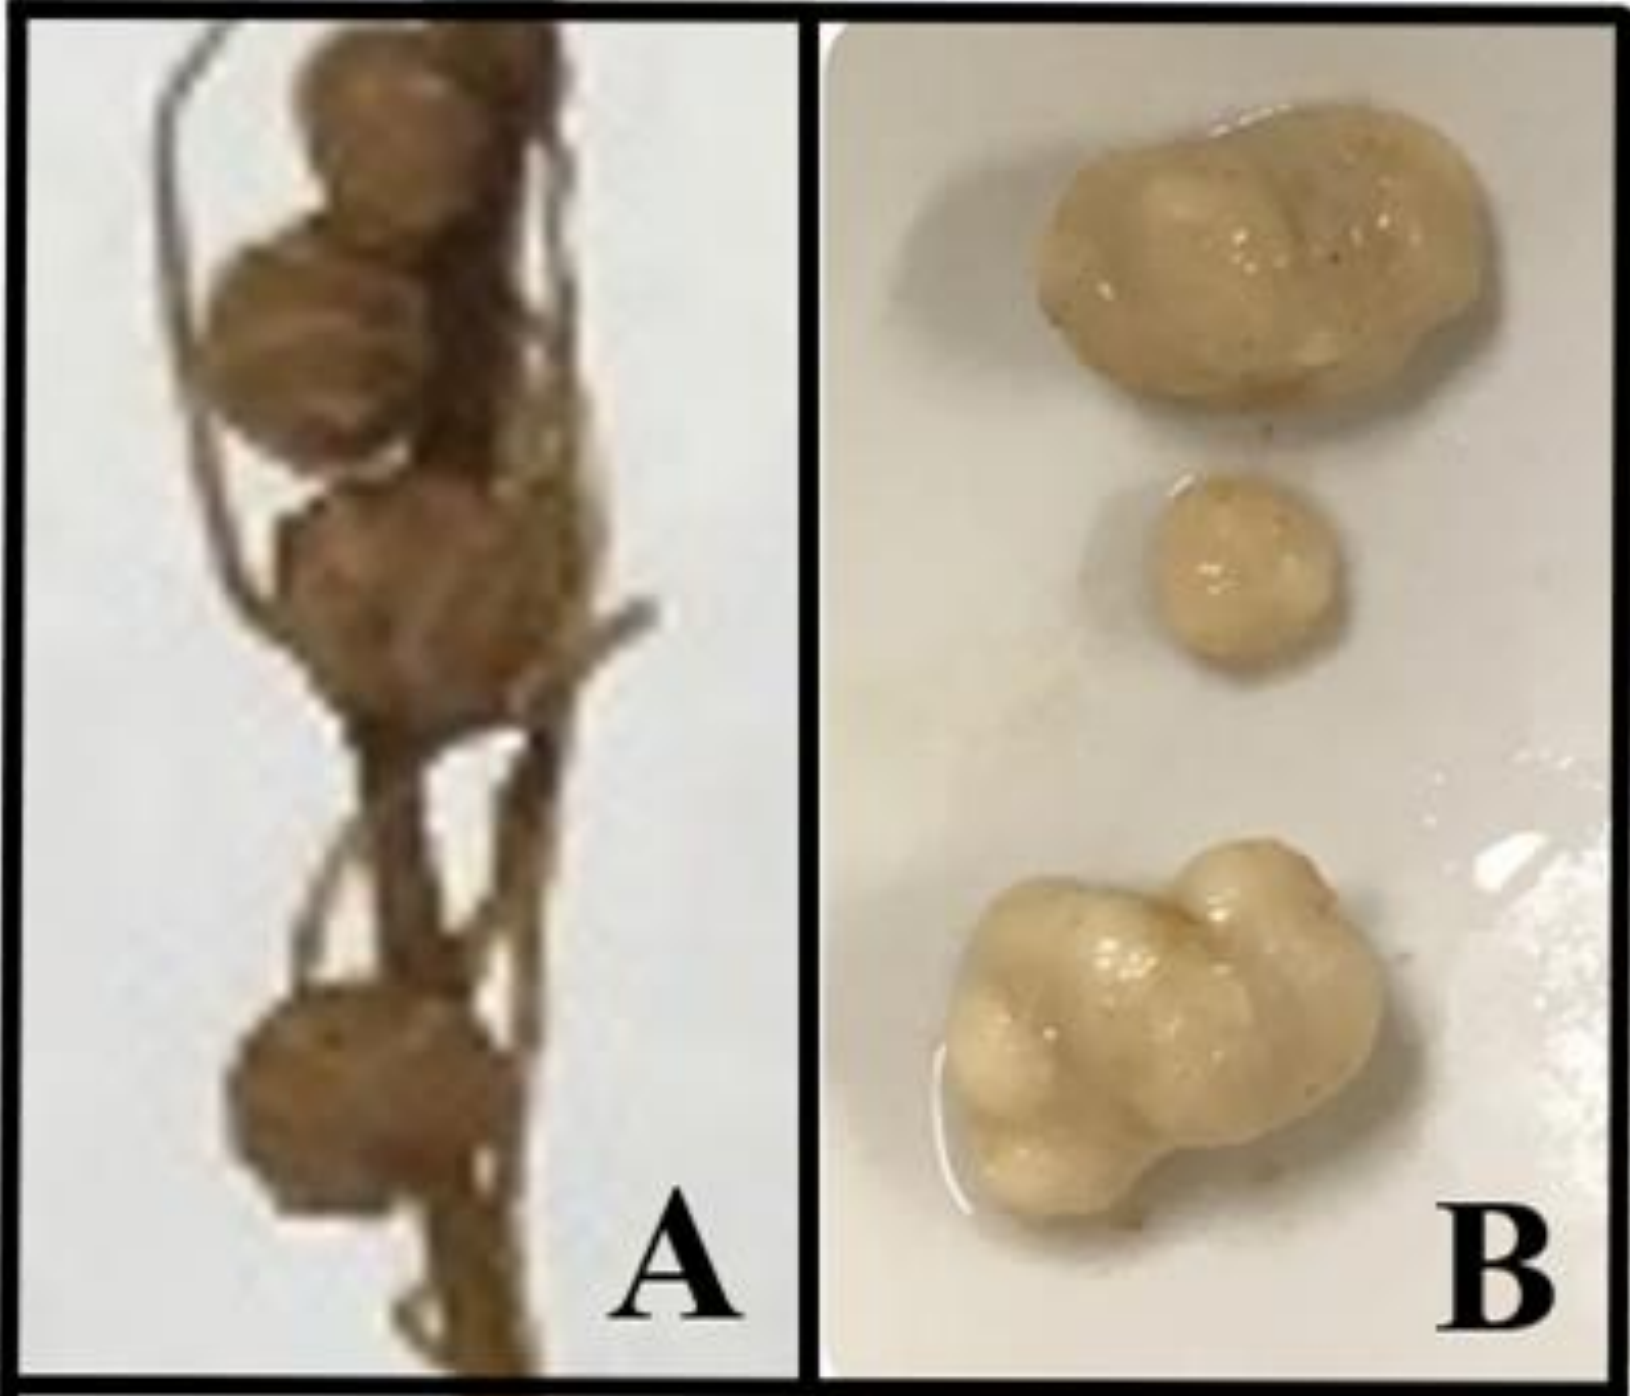

**Fig. S9**

PCR amplification and library preparation for Illumina MiSeq paired-end DNA sequencing

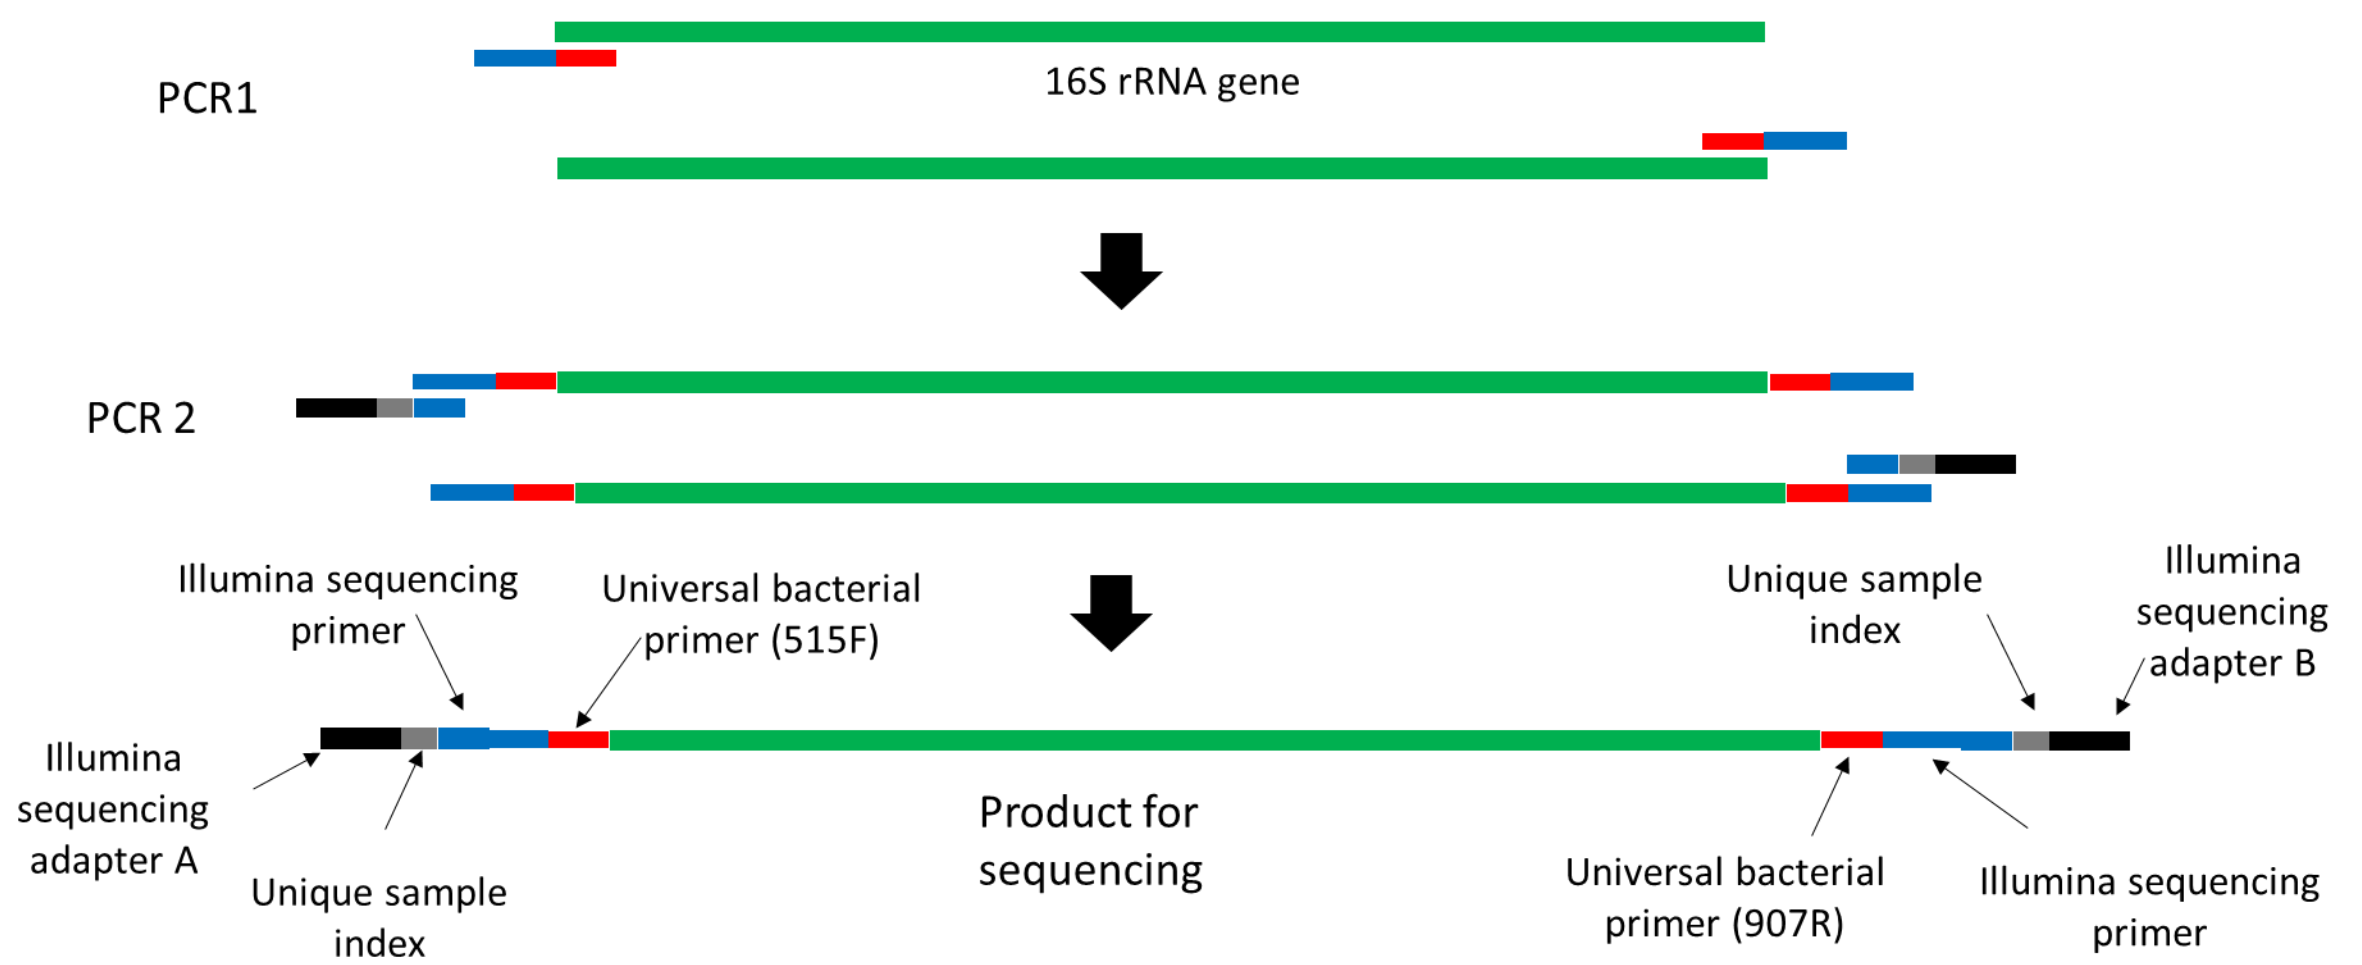

**First PCR primer set**

|             |                                                        |
|-------------|--------------------------------------------------------|
| <b>515F</b> | ACACTCTTTCCCTACACGACGCTCTTCCGATCTGTGCCAGCMGCCGCGG      |
| <b>907R</b> | GTGACTGGAGTTCAGACGTGTGCTCTTCCGATCTCCGTCAATTCMTTTRAGTTT |

**An example of a 2<sup>nd</sup> PCR primer set**

|             |                                                            |
|-------------|------------------------------------------------------------|
| <b>U701</b> | CAAGCAGAAGACGGCATACGAGATTCGCCTTAGTGACTGGAGTTCAGACGTGTG     |
| <b>U501</b> | AATGATACGGCGACCACCGAGATCTACACTAGATCGCACACTCTTTCCCTACACGACG |

**Table S1:** Important bacterial genera identified as non-rhizobial endophytes within soybean root nodules

| Isolates (genera)                                                                                                                                                   | Proposed Beneficial Feature                                | Reference |
|---------------------------------------------------------------------------------------------------------------------------------------------------------------------|------------------------------------------------------------|-----------|
| <b><u>Culturing-based studies</u></b>                                                                                                                               |                                                            |           |
| <i>Pseudomonas, Burkholderia, Enterobacter, Agrobacterium, Ochrobactrum, Acinetobacter, Proteus</i>                                                                 | Biocontrol agents                                          | (1)       |
| <i>Pseudomonas, Bacillus, Enterobacter, Klebsiella, Acetobacter Burkholderia, Rhizobium, Xanthomonas</i>                                                            | Phytohormone and Siderophore production, Biocontrol agents | (2)       |
| <i>Enterobacter, Microbacterium, Agrobacterium, Serratia marcescens, Chryseobacterium, Xanthomonas.</i>                                                             | Increase plant growth                                      | (3)       |
| <i>Pseudomonas, Acinetobacter, Enterobacter, Bacillus, Ochrobacterum</i>                                                                                            | BNF, IAA synthesis, nutrient availability                  | (4)       |
| <i>Agrobacterium, Bacillus, Pantoea, Serratia, Burkholderia, Acinetobacter</i>                                                                                      | BNF, IAA synthesis, nutrient availability                  | (5)       |
| <i>Bacillus, Paenibacillus</i>                                                                                                                                      | IAA synthesis and biocontrol agent                         | (6)       |
| <i>Tardiphaga, Afipia</i>                                                                                                                                           | -                                                          | (7)       |
| <i>Bacillus</i> spp. ( <i>subtilis</i> and <i>thuringiensis</i> )                                                                                                   | PGPR activity                                              | (8,9)     |
| <i>Bacillus endoradicis</i>                                                                                                                                         | -                                                          | (10)      |
| <i>Achromobacter, Agrobacterium, Burkholderia, Cronobacter, Enterobacter, Novosphingobium, Pantoea, Pseudomonas, Rahnella, Serratia, and Variovorax.</i>            | PGPR properties in vitro                                   | (11)      |
| <i>Achromobacter xylosoxidans</i>                                                                                                                                   | BNF                                                        | (12)      |
| <i>Paenibacillus polymyxa</i>                                                                                                                                       |                                                            | (13)      |
| 35 Non-rhizobial endophytes                                                                                                                                         | IAA synthesis, cellulose, pectinase                        | (14)      |
| <i>Enterobacter ludwigii, Variovorax paradoxus</i> (isolates from roots)                                                                                            | IAA synthesis, P-solubilization, PGPR                      | (15)      |
| <i>Pseudomonas, Ralstonia, Enterobacter, Pantoea, Acinetobacter.</i>                                                                                                | IAA synthesis, P-solubilization, BNF                       | (16)      |
| <b><u>Culture-independent studies</u></b>                                                                                                                           |                                                            |           |
| <i>Pseudomonas, Enterobacter, Bacillus, Paenibacillus</i> and some others (pooled root nodules from multiple plants) 1-40%                                          |                                                            | (17)      |
| Members of <i>Proteobacteria, Actinobacteria, Firmicutes</i> and <i>Bacteroidetes</i> . (pooled root nodules from multiple plants) 435 bacterial genera of 21 phyla |                                                            | (18)      |
| <i>Pseudomonas, Agrobacterium, Bacillus, Burkholderia, Microbacterium, Streptomyces</i> and others (pooled root nodules from multiple plants) 2434 OTUs of NREs     |                                                            | (19)      |

BNF = Biological N fixation; IAA = Indole acetic Acid; PGPR = Plant growth promoting rhizobacteria



**Table S3:** Bacterial diversity within root nodules of a plant and rhizosphere soil. In sample ID, L1-3 represents locations 1-3, P1-9 represents plant 1-9, N represents the nodules per plant, and R is for rhizosphere samples.

| Sample ID | Nodules per plant or soil samples | Average number sequences per plant | Chao 1 estimator | Shannon Diversity |
|-----------|-----------------------------------|------------------------------------|------------------|-------------------|
| L1P1N1-23 | 23                                | 56781 ± 4064                       | 29263 ± 2547     | 2.60 ± 0.09       |
| L1P2N1-23 | 23                                | 44829 ± 7763                       | 27932 ± 2986     | 2.83 ± 0.15       |
| L1P3N1-20 | 20                                | 25356 ± 2873                       | 13846 ± 1161     | 2.55 ± 0.10       |
| L2P4N1-22 | 22                                | 42484 ± 6579                       | 20072 ± 2681     | 2.50 ± 0.08       |
| L2P5N1-24 | 24                                | 35969 ± 3513                       | 22991 ± 2238     | 2.49 ± 0.09       |
| L2P6N1-24 | 24                                | 40697 ± 4773                       | 19554 ± 2210     | 2.32 ± 0.11       |
| L3P4N1-21 | 21                                | 20031 ± 1995                       | 9051 ± 853       | 2.03 ± 0.12       |
| L3P5N1-17 | 17                                | 14221 ± 1698                       | 8327 ± 451       | 2.04 ± 0.19       |
| L3P6N1-19 | 19                                | 43637 ± 7497                       | 17939 ± 2412     | 2.27 ± 0.07       |
| L1RP1-3   | 3                                 | 55296 ± 17176                      | 45861 ± 11477    | 5.78 ± 0.28       |
| *L2RP6    | 1                                 | 104715                             | 55208            | 5.72              |
| L3RP7-9   | 3                                 | 61554 ± 24622                      | 46193 ± 16634    | 6.40 ± 0.29       |

\* Location 2, the two of three rhizosphere samples resulted in less than 5,000 sequences. These two samples were not included the diversity analysis.

**Table S4:** Soil physiochemical characteristics of soil attached with soybean plants from three locations within Kindrick farm.

| Sample ID                           | pH      | OM      | NO <sub>3</sub> -N | NH <sub>4</sub> -N | P      | K     | Ca       | Mg   | CEC     |
|-------------------------------------|---------|---------|--------------------|--------------------|--------|-------|----------|------|---------|
| <b>Location 1<br/>(Toe slope)</b>   | 6.6±.2  | 3.5±0.1 | 9.7±.8             | 22.4±4.5           | 33±1.5 | 104±3 | 1223±216 | 31±8 | 9.3±1.8 |
| <b>Location 2<br/>(Sink hole 1)</b> | 6.5±0.1 | 3.1±0.2 | 8.7±1              | 11.4±3.5           | 16±2   | 103±2 | 1113±114 | 24±5 | 8.7±1   |
| <b>Location 3<br/>(Sink hole 2)</b> | 6.8±0.1 | 3.5±.02 | 26.7±1.8           | 8.2±2.5            | 34±2.7 | 134±7 | 1358±12  | 28±4 | 10±0.2  |

**Measured soil variables:** pH, organic matter (OM %), Nitrate N (ppm), Ammonium N (ppm), P (phosphorus); K (potassium); Ca (calcium); Mg (magnesium); P, K, Ca, Mg, are expressed as mg/L, CEC, potential cation exchange capacity (meq/100g).

**Sampling locations:** Location 1 & 2 were related to (Keeno-Bona complex, Karst, 2 to 5 % slopes), whereas, Location 3 was related to (Hoberg, silt loam, 2 to 5 percent slopes).



**Table S5:** List of unique indices used for each of the root nodules and soil samples.

| Sample  | F (indices) | R (indices) |
|---------|-------------|-------------|---------|-------------|-------------|---------|-------------|-------------|---------|-------------|-------------|---------|-------------|-------------|---------|-------------|-------------|---------|-------------|-------------|
| L1P1N1  | U701        | U509        | L1P2N12 | U734        | U509        | L2P4N3  | U739        | 511         | L2P5N12 | U724        | 512         | L2P6N21 | U709        | 513         | L3P8N11 | U718        | 515         | L3P9N19 | U742        | 515         |
| L1P1N2  | U702        | U509        | L1P2N13 | U735        | U509        | L2P4N4  | U740        | 511         | L2P5N13 | U725        | 512         | L2P6N22 | U710        | 513         | L3P8N14 | U719        | 515         | L3P9N20 | U743        | 515         |
| L1P1N3  | U703        | U509        | L1P2N14 | U736        | U509        | L2P4N5  | U741        | 511         | L2P5N14 | U726        | 512         | L2P6N23 | U711        | 513         | L3P8N15 | U720        | 515         | L3P9N21 | U744        | 515         |
| L1P1N4  | U704        | U509        | L1P2N15 | U737        | U509        | L2P4N6  | U742        | 511         | L2P5N15 | U727        | 512         | L2P6N24 | U712        | 513         | L3P8N18 | U721        | 515         | L3P9N24 | U745        | 515         |
| L1P1N6  | U705        | U509        | L1P2N16 | U738        | U509        | L2P4N7  | U743        | 511         | L2P5N16 | U728        | 512         | L3P7N1  | U737        | 514         | L3P8N19 | U722        | 515         | LP1R1   | U725        | 524         |
| L1P1N7  | U706        | U509        | L1P2N17 | U739        | U509        | L2P4N8  | U744        | 511         | L2P5N17 | U729        | 512         | L3P7N2  | U738        | 514         | L3P8N20 | U723        | 515         | LP2R2   | U726        | 524         |
| L1P1N8  | U707        | U509        | L1P2N18 | U740        | U509        | L2P4N9  | U745        | 511         | L2P5N18 | U730        | 512         | L3P7N3  | U739        | 514         | L3P8N21 | U724        | 515         | LP3R3   | U727        | 524         |
| L1P1N9  | U708        | U509        | L1P2N19 | U741        | U509        | L2P4N10 | U746        | 511         | L2P5N19 | U731        | 512         | L3P7N6  | U740        | 514         | L3P8N22 | U725        | 515         | LP4R4   | U728        | 524         |
| L1P1N10 | U709        | U509        | L1P2N20 | U742        | U509        | L2P4N11 | U747        | 511         | L2P5N20 | U732        | 512         | L3P7N7  | U741        | 514         | L3P8N23 | U726        | 515         | LP5R5   | U729        | 524         |
| L1P1N11 | U710        | U509        | L1P2N21 | U743        | U509        | L2P4N12 | U748        | 511         | L2P5N21 | U733        | 512         | L3P7N8  | U742        | 514         | L3P8N11 | U718        | 515         | LP6R6   | U730        | 524         |
| L1P1N12 | U711        | U509        | L1P2N22 | U744        | U509        | L2P4N13 | U701        | 512         | L2P5N22 | U734        | 512         | L3P7N9  | U743        | 514         | L3P8N14 | U719        | 515         | LP7R7   | U731        | 524         |
| L1P1N13 | U712        | U509        | L1P2N23 | U745        | U509        | L2P4N14 | U702        | 512         | L2P5N23 | U735        | 512         | L3P7N10 | U744        | 514         | L3P8N15 | U720        | 515         | LP8R8   | U732        | 524         |
| L1P1N14 | U713        | U509        | L1P2N24 | U746        | U509        | L2P4N15 | U703        | 512         | L2P5N24 | U736        | 512         | L3P7N11 | U745        | 514         | L3P8N18 | U721        | 515         | LP9R9   | U733        | 524         |
| L1P1N15 | U714        | U509        | L1P3N1  | U747        | U509        | L2P4N16 | U704        | 512         | L2P6N1  | U737        | 512         | L3P7N12 | U746        | 514         | L3P8N19 | U722        | 515         |         |             |             |
| L1P1N16 | U715        | U509        | L1P3N2  | U748        | U509        | L2P4N17 | U705        | 512         | L2P6N2  | U738        | 512         | L3P7N13 | U747        | 514         | L3P8N20 | U723        | 515         |         |             |             |
| L1P1N17 | U716        | U509        | L1P3N3  | U701        | U510        | L2P4N18 | U706        | 512         | L2P6N3  | U739        | 512         | L3P7N14 | U748        | 514         | L3P8N21 | U724        | 515         |         |             |             |
| L1P1N18 | U717        | U509        | L1P3N4  | U702        | U510        | L2P4N19 | U707        | 512         | L2P6N4  | U740        | 512         | L3P7N15 | U701        | 515         | L3P8N22 | U725        | 515         |         |             |             |
| L1P1N19 | U718        | U509        | L1P3N5  | U703        | U510        | L2P4N20 | U708        | 512         | L2P6N5  | U741        | 512         | L3P7N16 | U702        | 515         | L3P8N23 | U726        | 515         |         |             |             |
| L1P1N20 | U719        | U509        | L1P3N6  | U704        | U510        | L2P4N21 | U709        | 512         | L2P6N6  | U742        | 512         | L3P7N18 | U703        | 515         | L3P9N2  | U727        | 515         |         |             |             |
| L1P1N21 | U720        | U509        | L1P3N7  | U705        | U510        | L2P4N22 | U710        | 512         | L2P6N7  | U743        | 512         | L3P7N19 | U704        | 515         | L3P9N3  | U728        | 515         |         |             |             |
| L1P1N22 | U721        | U509        | L1P3N8  | U706        | U510        | L2P4N23 | U711        | 512         | L2P6N8  | U744        | 512         | L3P7N20 | U705        | 515         | L3P9N4  | U729        | 515         |         |             |             |
| L1P1N23 | U722        | U509        | L1P3N9  | U707        | U510        | L2P4N24 | U712        | 512         | L2P6N9  | U745        | 512         | L3P7N21 | U706        | 515         | L3P9N6  | U730        | 515         |         |             |             |
| L1P1N24 | U723        | U509        | L1P3N10 | U708        | U510        | L2P5N1  | U713        | 512         | L2P6N10 | U746        | 512         | L3P7N22 | U707        | 515         | L3P9N7  | U731        | 515         |         |             |             |
| L1P2N1  | U724        | U509        | L1P3N13 | U709        | U510        | L2P5N2  | U714        | 512         | L2P6N11 | U747        | 512         | L3P7N23 | U708        | 515         | L3P9N8  | U732        | 515         |         |             |             |
| L1P2N2  | U725        | U509        | L1P3N14 | U710        | U510        | L2P5N3  | U715        | 512         | L2P6N12 | U748        | 512         | L3P7N24 | U709        | 515         | L3P9N9  | U733        | 515         |         |             |             |
| L1P2N3  | U726        | U509        | L1P3N15 | U711        | U510        | L2P5N4  | U716        | 512         | L2P6N13 | U701        | 513         | L3P8N1  | U710        | 515         | L3P9N10 | U734        | 515         |         |             |             |
| L1P2N5  | U727        | U509        | L1P3N16 | U712        | U510        | L2P5N5  | U717        | 512         | L2P6N14 | U702        | 513         | L3P8N2  | U711        | 515         | L3P9N11 | U735        | 515         |         |             |             |
| L1P2N6  | U728        | U509        | L1P3N17 | U713        | U510        | L2P5N6  | U718        | 512         | L2P6N15 | U703        | 513         | L3P8N3  | U712        | 515         | L3P9N13 | U736        | 515         |         |             |             |
| L1P2N7  | U729        | U509        | L1P3N19 | U714        | U510        | L2P5N7  | U719        | 512         | L2P6N16 | U704        | 513         | L3P8N6  | U713        | 515         | L3P9N14 | U737        | 515         |         |             |             |
| L1P2N8  | U730        | U509        | L1P3N20 | U715        | U510        | L2P5N8  | U720        | 512         | L2P6N17 | U705        | 513         | L3P8N7  | U714        | 515         | L3P9N15 | U738        | 515         |         |             |             |
| L1P2N9  | U731        | U509        | L1P3N21 | U716        | U510        | L2P5N9  | U721        | 512         | L2P6N18 | U706        | 513         | L3P8N8  | U715        | 515         | L3P9N16 | U739        | 515         |         |             |             |
| L1P2N10 | U732        | U509        | L1P3N22 | U717        | U510        | L2P5N10 | U722        | 512         | L2P6N19 | U707        | 513         | L3P8N9  | U716        | 515         | L3P9N17 | U740        | 515         |         |             |             |
| L1P2N11 | U733        | U509        | L1P3N23 | U718        | U510        | L2P5N11 | U723        | 512         | L2P6N20 | U708        | 513         | L3P8N10 | U717        | 515         | L3P9N18 | U741        | 515         |         |             |             |

## References

1. Tokgöz S. 2018. Exploration of soybean nodule microbiome for plant health management, Ms Thesis. University of Nebraska, Lincoln, NE.
2. Dalal J, Kulkarni N. 2013. Antagonistic and plant growth promoting potentials of indigenous endophytic bacteria of soybean (*Glycine max* L. Merr). *Curr Res Microbiol Biotechnol* 1:62–69.
3. Vargas-Díaz AA, Ferrera-Cerrato R, Silva-Rojas HV, Alarcón AA. 2019. Isolation and evaluation of endophytic bacteria from root nodules of *Glycine max* L. (Merr.) and their potential use as biofertilizers. *Span J Agric Res*, 17:e1103. DOI:10.5424/sjar/2019173-14220.
4. Zhao L, Xu Y, Lai X. 2018. Antagonistic endophytic bacteria associated with nodules of soybean (*Glycine max* L.) and plant growth promoting properties. *Braz J Microbiol* 49:269–278. <https://doi.org/10.1016/j.bjm.2017.06.007>.
5. Li JH, Wang E, Chen WF, Chen XC. 2008. Genetic Diversity and Potential for Promotion of Plant Growth Detected in Nodule Endophytic Bacteria of Soybean Grown in Heilongjiang Province of China. *Soil Biol and Biochem* 40:238–246.
6. Senthilkumar M, Swarnalakshmi K, Gov-indasamy V, Lee YK, Annapurna K. 2009. Biocontrol potential of soybean bacterial endophytes against charcoal rot fungus, *Rhizoctonia bataticola*. *Curr Microbiol* 58:288–293. <https://doi.org/10.1007/s00284-008-9329-z>.
7. Bromfield ESP, Cloutier S, Tambong JT, Tran Thi TV. 2017. Soybeans inoculated with root zone soils of Canadian native legumes harbour diverse and novel *Bradyrhizobium* spp. that possess agricultural potential. *Syst Appl Microbiol* 40:440–447. <https://doi.org/10.1016/j.syapm.2017.10.003>.
8. Bai Y, D'Aoust F, Smith DL, Driscoll BT. 2002. Isolation of plant-growth-promoting *Bacillus* strains from soybean root nodules. *Can J of Microbiol* 48:230–238. <https://doi.org/10.1139/w02-014>.
9. Mishra PK, Mishra S, Selvakumar G, Kundu S, Gupta HS. 2009. Enhanced soybean (*Glycine max* L.) plant growth and nodulation by *Bradyrhizobium japonicum*-SB1 in presence of *Bacillus thuringiensis*-KR1. *Soil Plant Sci* 59:189–196. <https://doi.org/10.1080/09064710802040558>.
10. Zhang YZ, Chen WF, Li M, Sui XH, Liu H-C, Zhang XX, Chen WX. 2012. *Bacillus endoradicis* sp. nov., an endophytic bacterium isolated from soybean root. *Int J Syst Evol Microbiol* 62:359–363. <https://doi.org/10.1099/ijs.0.028936-0>.
11. Aserse AA, Rasanen LA, Aseffa F, Hailemariam A, Lindstrom K. 2013. Diversity of sporadic symbionts and nonsymbiotic endophytic bacteria isolated from nodules of woody, shrub, and food legumes in Ethiopia. *Appl Microbiol Biotechnol* 97:10117–10134. <https://doi.org/10.1007/s00253-013-5248-4>.
12. Wedhastri S, Fardhani DM, Kabirun S, Widada J, Widiyanto D, Evizal R, Prijambada ID. 2013. Legume nodulating bacterium, *Achromobacter xylosoxidans* found in tropical shrub agroecosystem, Sumatera, Indonesia. *Indones J Biotechnol* 18:161–167. <https://doi.org/10.22146/ijbiotech.7879>.
13. Annapurna K, Ramadoss D, Bose P, Vithalkumar L. 2013. *In situ* localization of *Paenibacillus polymyxa* HKA-15 in roots and root nodules of soybean (*Glycine max* L.). *Plant Soil* 373:641–648. <https://doi.org/10.1007/s11104-013-1825-7>.
14. Hung PQ, Kumar SM, Govindsamy V, Annapurna K. 2007. Isolation and characterization of endophytic bacteria from wild and cultivated soybean varieties. *Biol Fertil Soils* 44:155–162. <https://doi.org/10.1007/s00374-007-0189-7>.

15. de Almeida Lopes KB, Carpentieri-Pipolo V, Oro TH, Stefani-Pagliosa E, Degrassi G. 2016. Culturable endophytic bacterial communities associated with field-grown soybean. *J Appl Microbiol* 120:740–755. <https://doi.org/10.1111/jam.13046>.
16. Kuklinsky-Sobral J, Araujo WL, Mendes R, Geraldi IO, Pizzirani-Kleiner AA, Azevedo JL. 2004. Isolation and characterization of soybean-associated bacteria and their potential for plant growth promotion. *Environ Microbiol* 6:1244–1251. <https://doi.org/10.1111/j.1462-2920.2004.00658.x>.
17. Sharaf H, Rodrigues RR, Moon J, Zhang B, Mills K, Williams MA. 2019. Unprecedented bacterial community richness in soybean nodules vary with cultivar and water status. *Microbiome* 7:63. <https://doi.org/10.1186/s40168-019-0676-8>.
18. Xiao X, Chen W, Zong L, Yang J, Jiao S, Lin Y, Wang E, Wei G. 2017. Two cultivated legume plants reveal the enrichment process of the microbiome in the rhizocompartments. *Mol Ecol* 26:1641–1651. <https://doi.org/10.1111/mec.14027>.
19. Zhang B, Du N, Li Y, Shi P, Wei G. 2018. Distinct biogeographic patterns of rhizobia and non-rhizobial endophytes associated with soybean nodules across China. *Sci Total Environ* 643:569–578. <https://doi.org/10.1016/j.scitotenv.2018.06.240>.
